# Supplementary material
Source: Springer Nature journal article supplement (https://www.springermedizin.de/resource/supplementary/13024_2014_578_MOESM4_ESM.pdf/9644420)

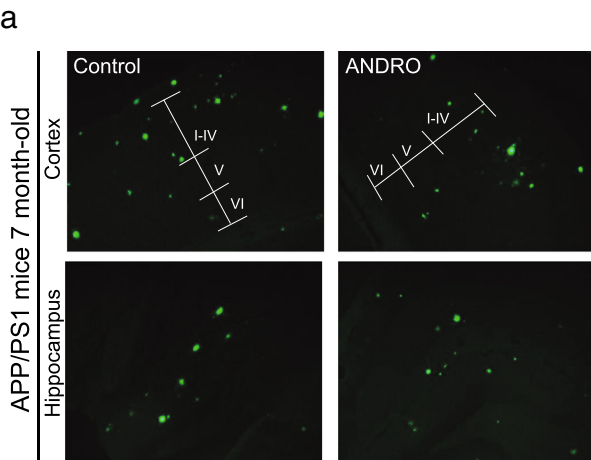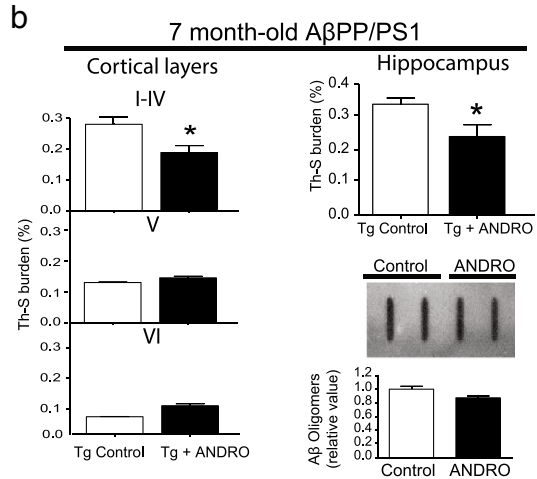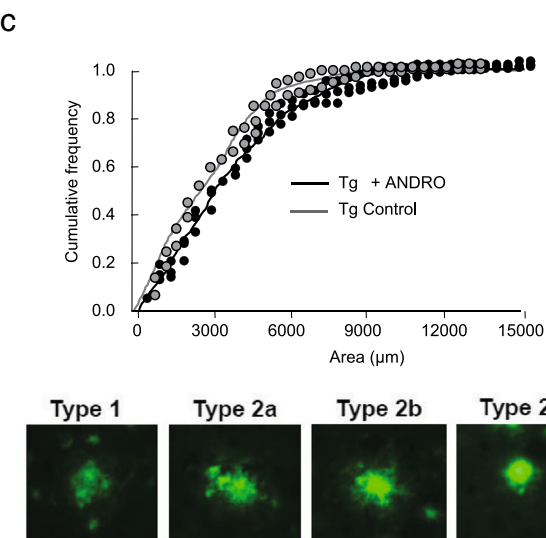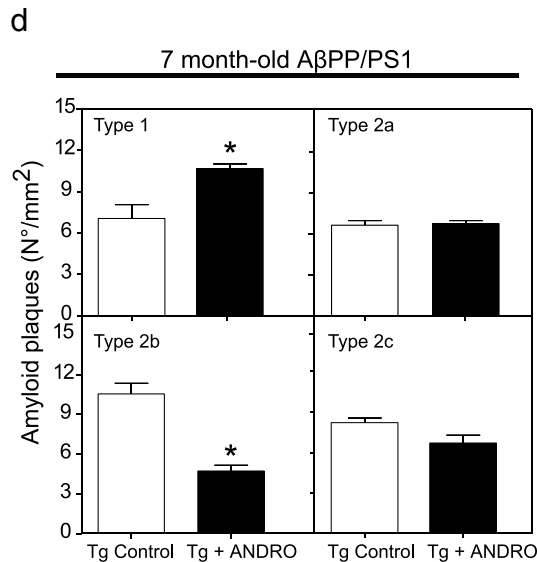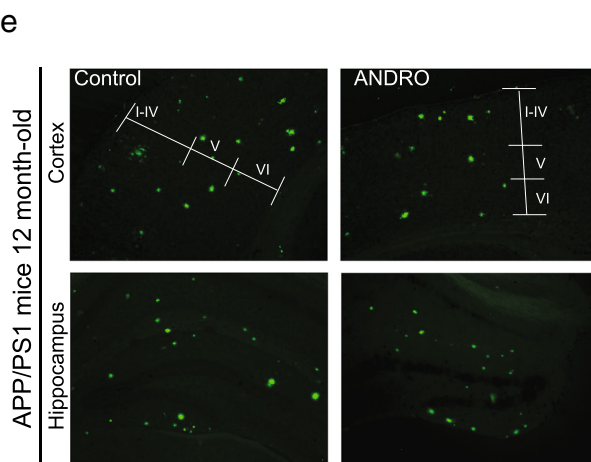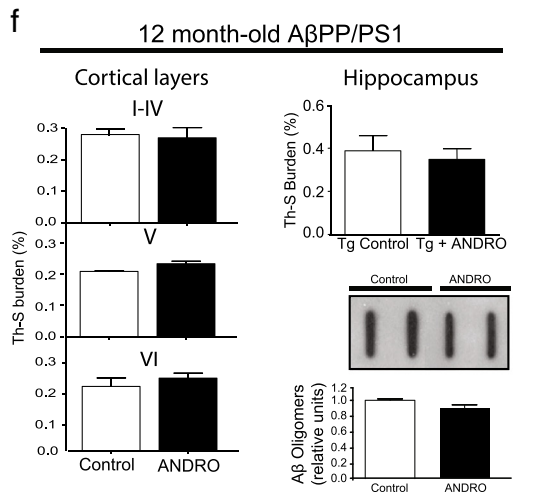

Supplement: MOESM4 [file 9644420]
